# Supplementary material for: Accurate simulation of transient landscape evolution by eliminatingnumerical diffusion: the TTLEM 1.0 model
Source: Copernicus journal article supplement (doi:10.5194/esurf-2016-39), 2016-07-18
Supplement: Supplementary file 1 [file esurf-2016-39-supplement.zip]

## **Supplement of: TTLEM 1.0: A numerical package for accurate simulation of transient landscape evolution in MATLAB**

Benjamin Campforts<sup>1</sup>, Wolfgang Schwanghart<sup>2</sup> and Gerard Govers<sup>1</sup>

<sup>1</sup> KU Leuven, Division Geography, Department of Earth and Environmental Sciences

<sup>2</sup> Universität Potsdam, Institute for Earth and Environmental Science

This supplement describes the movies referred to in the text of the paper.

**Movie S1.** Steady state river networks obtained with different model configurations for model runs initiated from a flat, zero elevation surface. The ages are given in the title of the subplots. The configuration of the different model simulations is explained in the text and parameter values are listed in Table 1.

**Movie S2.** Steady state river networks obtained with different model configurations for model runs initiated from a surface with elevations randomly varying between 0 and 50 m. The configuration of the different model simulations is explained in the text and parameter values are listed in Table 1.

**Movie S3.** A synthetic steady state landscape produced as the testing environment to verify and compare the different numerical schemes implemented in TTLEM. Model runtime was 150 Myr, uplift rate was assumed to be spatially uniform over the area (block uplift) and fixed to  $10^{-3}\text{m yr}^{-1}$ . Other model parameter values are listed in Table 1.
